# Supplementary material for: Amelioration of Colitis in Mouse Model by Exploring Antioxidative Potentials of an Indigenous Probiotic Strain of Lactobacillus fermentum Lf1
Source: Biomed Res Int. 2014 Jul 1;2014:206732. doi: 10.1155/2014/206732 (PMC4100452; doi:10.1155/2014/206732)
Supplement: Supplementary file 1 — The grading of Histological changes was done by the methods given previously by Meerveld and Tyler [35]. The scoring of histological changes were done as “0” for crypt intact; “1” for loss of 1/3 crypt; “2” for loss of 2/3 crypt; “3” for loss of entire crypt with intact surface epithelium; and “4” for loss of entire crypt with erosion of surface epithelium. The extend of histological damage (in % involvement) in experiment animals were scores as “0” for 1–25% damage; “1” for 26–50% damage; “2” for 51–75% damage and '3' for 76–100% damage. While, the severity of the inflammation were scored as “0” for normal appearance; “1” for focal inflammatory cell infiltrate; “2” for inflammatory cell infiltrate, gland drop out and crypt abscess; “3” for mucosal ulceration respectively. [file 206732.f1.pdf]

Supplementary Data:

Fig. 1S Detailed description of *In vivo* experimental design

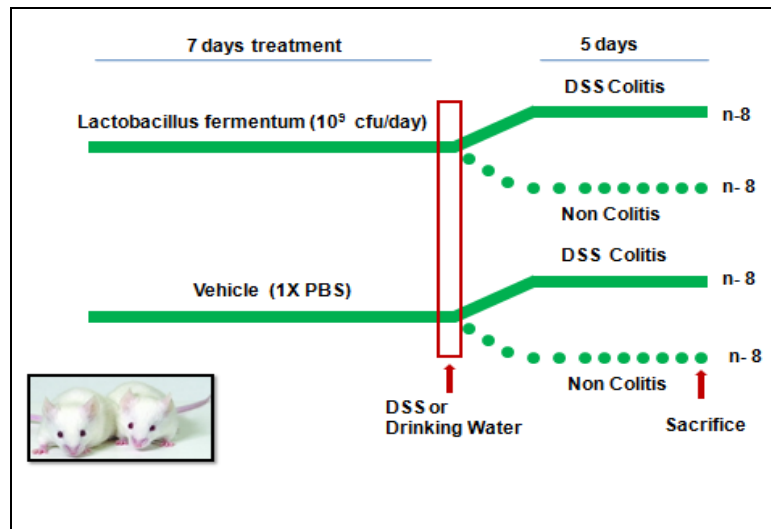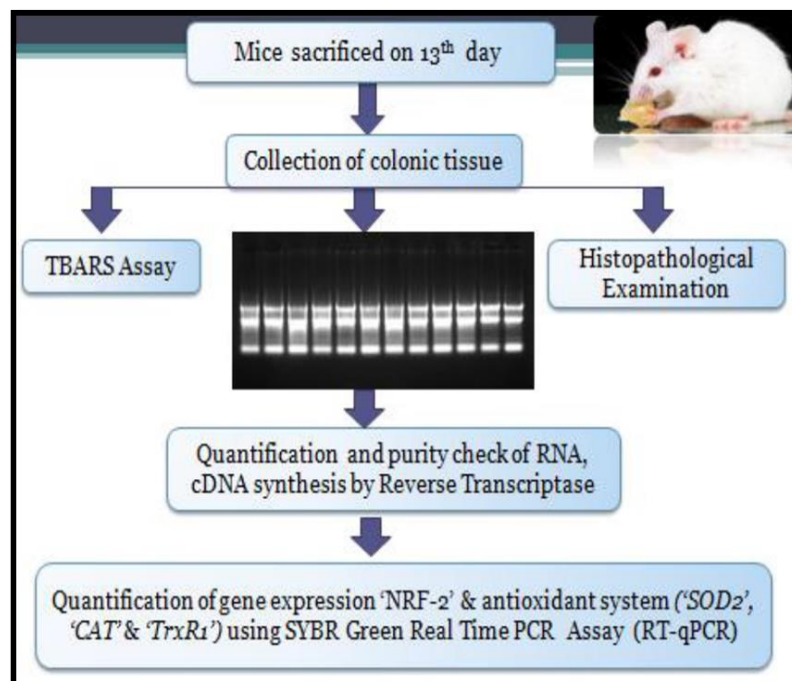

## 9     **Relative Expression Studies**

10            The primers for the house keeping genes (*ACTB* for mouse colon) and target genes  
11 (*Nfr2*, *SOD2*, *CAT1* and *TrxR-1* from mouse colon) were either taken from the published  
12 papers or designed from the genome sequence available at NCBI gene bank and using Primer  
13 3 plus software (<http://www.bioinformatics.nl/cgi-bin/primer3plus/primer3plus.cgi>). The  
14 primers were got custom-synthesized from Imperial Biomed (Integrated DNA Technologies,  
15 Inc.; [www.idtdna.com](http://www.idtdna.com)) and Sigma, USA. While designing the primers for Real Time PCR,  
16 the G-C content was kept within 40-60%, the amplified products size in the range of 100-200  
17 bp and T<sub>m</sub> in between 55-60°C. The specificity of the designed primer pair was ensured by  
18 BLAST analysis. The amplified products were checked on 2% agarose gel followed by melt  
19 curve analysis of the PCR amplified products to rule out the possibility of primer dimer  
20 formation.

### 21            **i) Melt Curve Analysis and Amplification of *Nfr2***

22  
23            The amplification parameters for '*Nfr2*' included initial denaturation at 95°C for 5  
24 min. followed by 40 cycles each of denaturation at 95°C for 30 sec, annealing at 53°C for 30  
25 sec. and extension at 72°C for 45 sec. and for '*ACTB*' were kept same as for '*Nfr2*'.  
26 Furthermore, in order to calculate RT-qPCR efficiencies and linearity, standard curves were  
27 prepared for the target and reference gene by plotting C<sub>q</sub> values versus log cDNA (reverse  
28 transcribed total RNA) concentration inputs by preparing serial dilutions of cDNA i.e. 300,  
29 200, 100, 50 and 12.5 and 6.25 ng/μl for '*ACTB*' and 100, 50, 25, 12.5, 5 and 1 ng/μl for  
30 '*Nfr2*' respectively. As is quite evident from the **Fig. 2S (Supplementary Data)**, both the  
31 curves showed high linearity (Pearson correlation coefficient R<sup>2</sup> > 0.978). The slopes of  
32 '*Nfr2*' and '*ACTB*' curves were -3.363 and -3.360 respectively that indicated high real-time  
33 PCR efficiencies of 1.983 and 1.984 for both the genes.

**Figure: 2S Melt Curve Analysis and Amplification Curves of ‘Nrf2’ and ‘ACTB’**

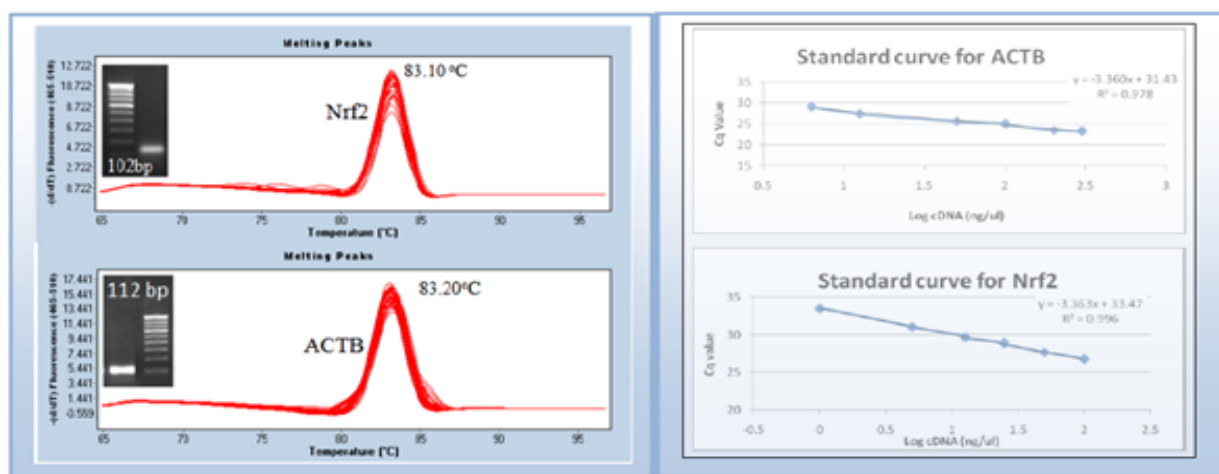

## ii) Melt Curve Analysis and Amplification curve of ‘SOD2’, Thioredoxin Reductase and Catalase

‘SOD1’, ‘TrxR-1’ and ‘CAT’ as well as ‘ACTB’ from the given slopes plotted with the help of LightCycler software. Cq values versus log cDNA (reverse transcribed total RNA) concentration inputs by preparing serial dilutions of cDNA i.e. 300, 200, 100, 50 and 12.5 and 6.25 ng/μl for ‘ACTB’ and 100, 50, 25, 12.5 and 5 ng/μl target genes respectively were plotted to calculate the slope (mean ± SD;  $n = 3$ ). The corresponding real-time PCR efficiency ( $E$ ) of one cycle in the exponential phase was calculated according to the equation:  $E = 10^{[-1/\text{slope}]}$ . As is quite evident from the **Fig. 3Sa**, all the curves showed high linearity (Pearson correlation coefficient  $R^2 > 0.978$ ). The slopes of ‘SOD2’, ‘TrxR-1’, ‘CAT’ and ‘ACTB’ curves were -3.351, -3.363, -3.349 and -3.360 respectively that indicated high real-time PCR efficiencies of 1.988, 1.98, 1.989 and 1.984 in respect of the targeted genes. ‘SOD1’, ‘TrxR-1’ and ‘CAT’ as well as ‘ACTB’ from the given slopes plotted with the help of LightCycler software. Cq values versus log cDNA (reverse transcribed total RNA) concentration inputs by preparing serial dilutions of cDNA i.e. 300, 200, 100, 50 and 2.5 and 6.25 ng/μl for ‘ACTB’ and 100, 50, 25, 12.5 and 5 ng/μl target genes respectively were plotted to calculate the slope (mean ± SD;  $n = 3$ ). The corresponding real-time PCR efficiency ( $E$ ) of one cycle in the exponential phase was calculated according to the equation:  $E = 10^{[-1/\text{slope}]}$ .

**Fig. 3Sa : Standard curves for the target and reference genes**

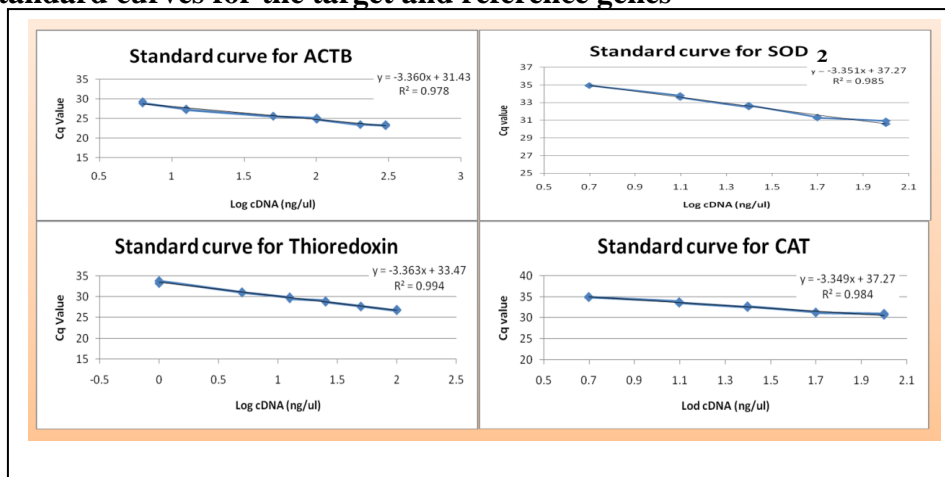

The amplification parameters for ‘SOD2’ and ‘ACTB’ included initial denaturation at 95°C for 5 min. followed by 40 cycles each of denaturation at 95°C for 30 sec, annealing at 53°C for 30 sec. and extension at 72°C for 45 sec

**Fig. 3Sb. Specificity of RTqPCR products on agarose gel and melt curve analysis of ‘SOD2’, Thioredoxin Reductase and Catalase in colitis mouse model**

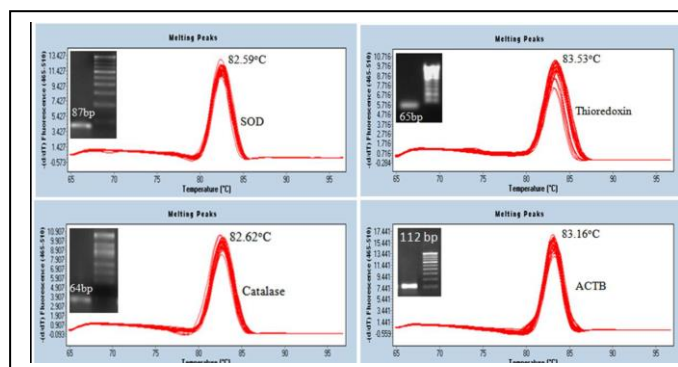

98 **Table.1S – Disease activity index parameters**

| Parameter         | Change         | Score |
|-------------------|----------------|-------|
| Weight loss       | 0              | 0     |
|                   | 1 to < 5%      | 1     |
|                   | 5 to < 10%     | 2     |
|                   | 10 to < 20%    | 3     |
|                   | >20%           | 4     |
| Stool Consistency | Negative       | 0     |
|                   | Loose          | 2     |
|                   | Diarrhoea      | 4     |
| Blood in stool    | Normal         | 0     |
|                   | Blood traces   | 2     |
|                   | Gross Bleeding | 4     |

99

100

101 **Table. 2Sa -Grade of Histological Changes**

| Grade of Disease                                        | Score |
|---------------------------------------------------------|-------|
| Crypt intact                                            | 0     |
| Loss 1/3 crypt                                          | 1     |
| Loss of 2/3 crypt                                       | 2     |
| Loss of entire crypt with intact surface epithelium     | 3     |
| Loss of entire crypt with erosion of surface epithelium | 4     |

102

103

104

105 **Table. 2S b – Extent of Histological damage recorded in experimental animals**

| <b>Extent of Damage (% involvement)</b> | <b>Score</b> |
|-----------------------------------------|--------------|
| 1-25%                                   | 0            |
| 26-50%                                  | 1            |
| 51-75%                                  | 2            |
| 76-100%                                 | 3            |

106

107 **Table. 2S c – Severity of Histological damage recorded in experimental animals**

| <b>Score for Severity</b>                                         | <b>Score</b> |
|-------------------------------------------------------------------|--------------|
| Normal                                                            | 0            |
| Focal inflammatory cell infiltrate                                | 1            |
| Inflammatory cell infiltrate, gland drop out<br>and crypt abscess | 2            |
| Mucosal ulceration                                                | 3            |

108

109

Source: Meeryeld and Tyler, 2006
